# Supplementary material
Source: PubMed Central journal article supplement (PMC6689933)
Supplement: pnas.1905832116.sapp.pdf [file pnas.1905832116.sapp.pdf]

## Supplementary Information for

Trans-synaptic Fish-lips Signaling Prevents Misconnections between Non-synaptic Partner Olfactory Neurons

Qijing Xie, Bing Wu, Jiefu Li, Chuanyun Xu, Hongjie Li, David J Luginbuhl, Xin Wang, Alex Ward, Liqun Luo

Email: [lluo@stanford.edu](mailto:lluo@stanford.edu)

**This PDF file includes:**

Figs. S1 to S8

**Other supplementary materials for this manuscript include the following:**

Dataset S1

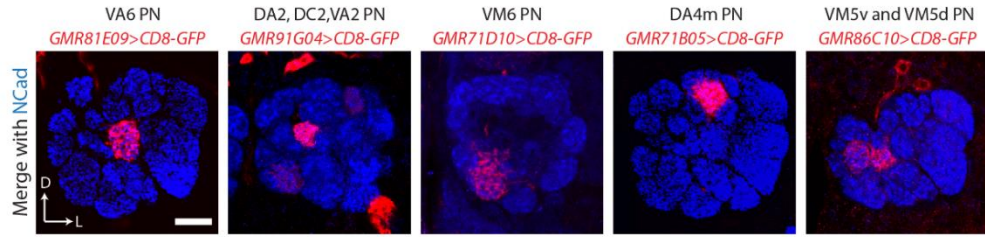

**Fig. S1. *Enhancer-LexA* lines label specific PN neurons in adult.**

Confocal sections of adult antennal lobe are shown. Neuronal processes are labeled by five different *enhancer-LexA*>*LexAop-mCD8GFP* (red) lines. Blue channel shows neuropil staining by the Ncad antibody.

Scale bars, 20  $\mu$ m.

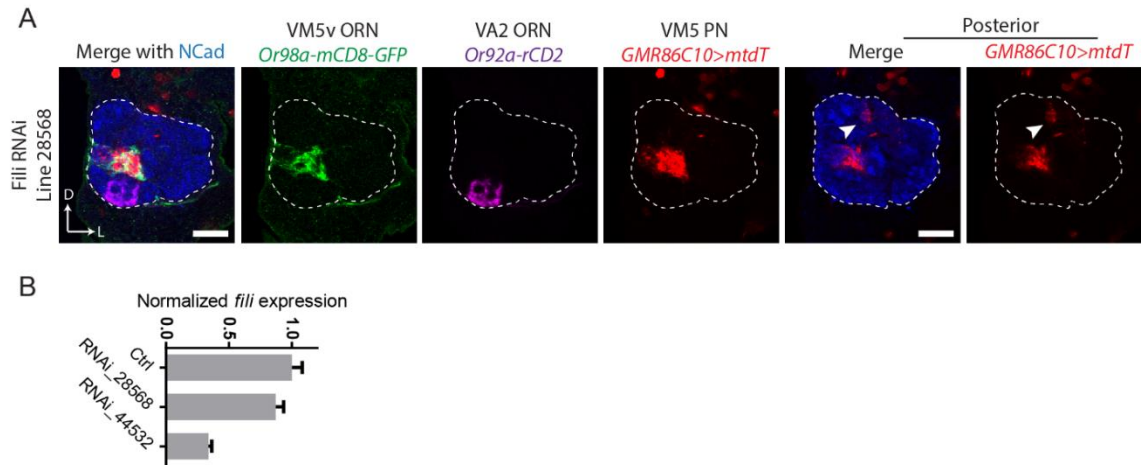

**Figure S2. *fili* knockdown by two separate RNAi lines shows PN dendrite targeting defect.**

(A) *C155-GAL4* drives *UAS-fili-RNAi* (Bloomington 28568) shows PN dendrite targeting defect. Ectopic PN target are indicated by arrowhead on the posterior section. (mistargeting in 7/20 antennal lobes). Scale bars, 20  $\mu$ m.

(B) Quantitative PCR (qPCR) measurement of the knockdown efficiency of *fili* using two *UAS-fili-RNAi* lines. *C155-GAL4* was crossed with either *w<sup>1118</sup>* (control) or two Fili-RNAi lines. mRNA was extracted from 5-day-old adult fly heads (n=3 biological replicates of 10 heads pooled for each condition). Expression levels are normalized to *actin5C*. Error bars show SEM.

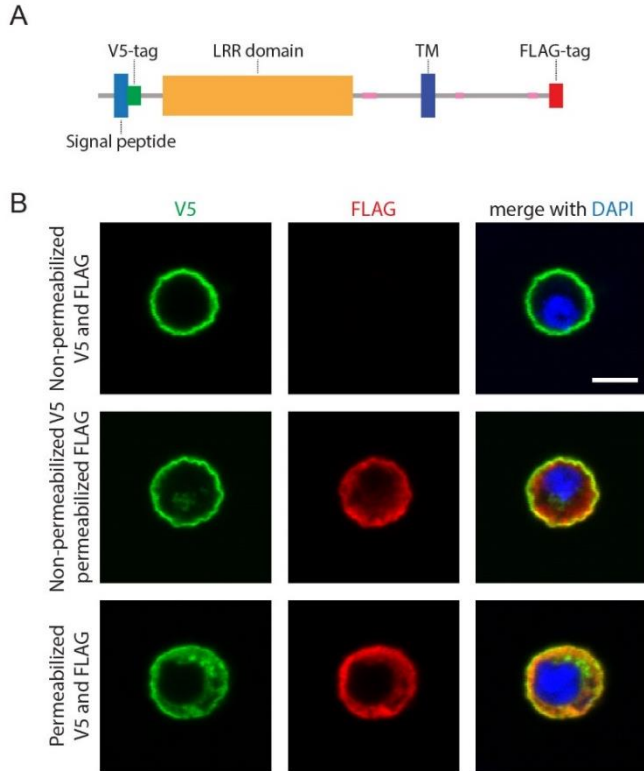

**Figure S3. Fili is expressed on the plasma membrane.**

(A) A schematic of the *SP-V5-Fili-Flag* construct used for membrane expression assay (see Figure S5A for a more detailed description of primary structure of Fili).

(B) Representative immunofluorescent images of S2 cells expressing *UAS-SP-V5-Fili-Flag*. Top panel: non-permeabilized staining of V5 and FLAG antibodies. Middle panel: non-permeabilized V5 antibody staining and permeabilized FLAG antibody staining. Bottom: permeabilized staining of V5 and FLAG antibodies.

Scale bar, 5  $\mu\text{m}$ .



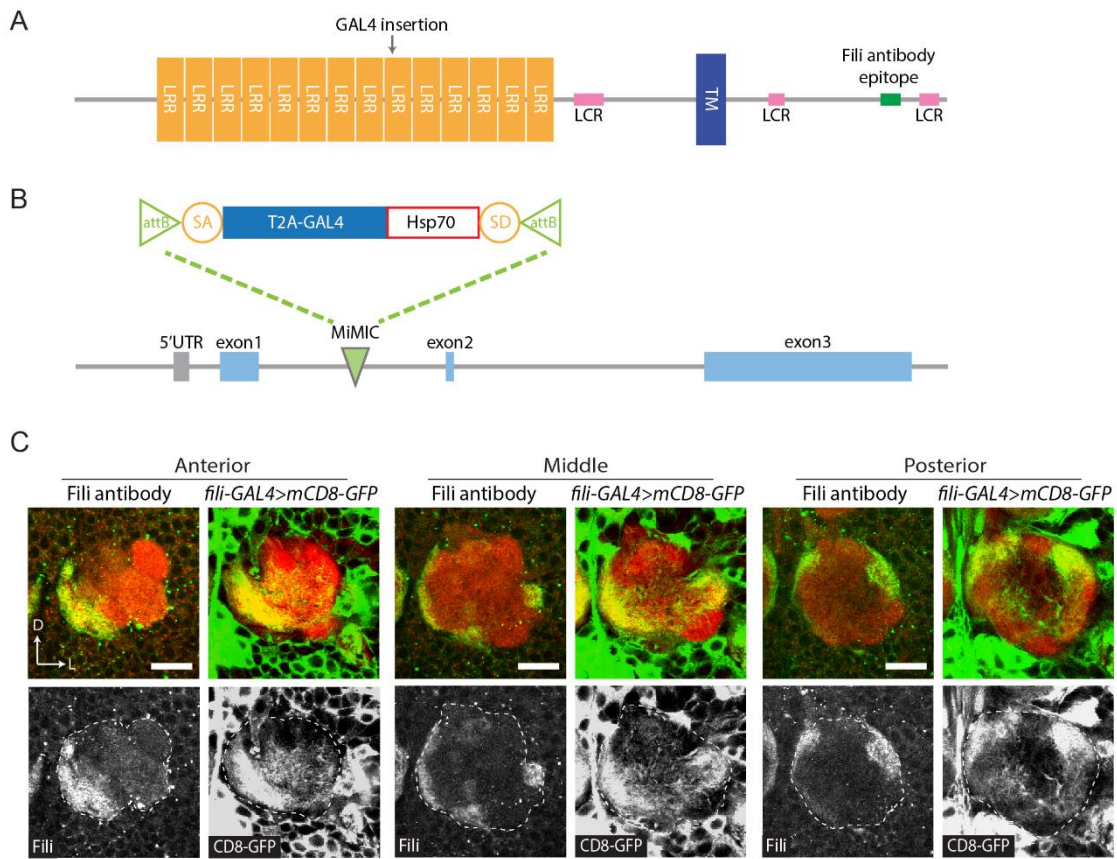

**Figure S5. Fili expression revealed by antibody and transcriptional reporter GAL4 showed similar pattern.**

(A) Fili protein domain prediction. The blue bar (TM) represents transmembrane domain. Orange bars (LRR) indicates leucine-rich repeat domains. Pink bars (LCR) indicate low-complexity regions. The epitope for Fili antibody is represented by the green bar.

(B) Design of *fili-GAL4*. A *T2A-GAL4* cassette was inserted into a MiMIC locus in the first intron of *fili*. SA, splicing acceptor. Hsp70, terminator sequence of *Hsp70*. SD, splicing donor. Blue bars: coding exons of *fili*.

(C) Fili antibody staining and *fili-GAL4* shows consistent pattern at 48h APF. Three optical sections (anterior, middle, and posterior) are shown for both Fili antibody staining and CD8-GFP (green). Neuropil is visualized by antibody against either NC82 or NCad (red). Dashed lines outline the antennal lobe.

Scale bars, 20  $\mu$ m.



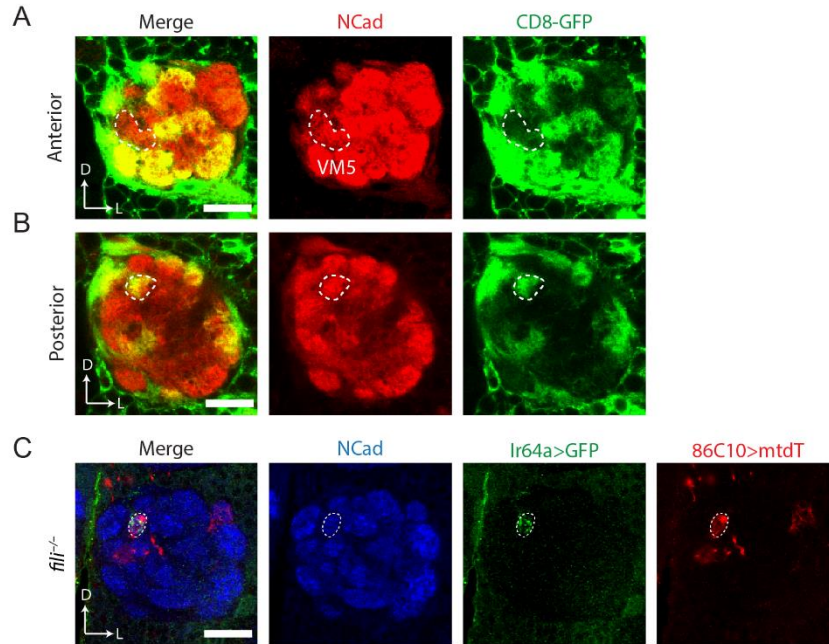

**Figure S6. The ectopic target site of VM5 PN dendrites is innervated by *fili-GAL4+* ORN axons.**

*ey-FLP* intersecting with *fili-GAL4* together with *UAS-FRT-stop-FRT-mCD8GFP* shows *fili* expression pattern in ORNs in the 48 hours APF antennal lobe.

(A) VM5v and VM5d glomeruli (outlined by dashed line) do not have detectable ORN *Fili* signal.

(B) The ectopic targeting site (outlined by dashed line) of VM5 PNs have high ORN *Fili* signal.

(C) VM5 PN dendrites, labeled by *86C10-LexA>LexAop-mtdT*, mistarget to DC4 glomerulus (outlined by dashed line) which is labeled by *Ir64a-GAL4>UAS-mCD8-GFP*.

Scale bars, 20  $\mu\text{m}$ .

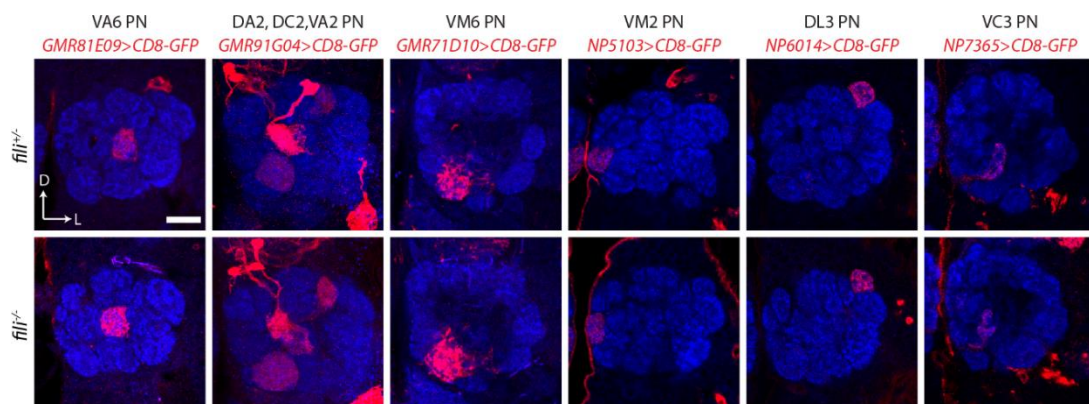

**Figure S7. Fili is not required for the targeting of the 8 tested PN classes.**

PN dendrites (red) are visualized in *fil<sup>+/-</sup>* control animal and *fil<sup>-/-</sup>* for VA6 PN (*GMR81E09-GAL4*); DA2, DC2, and VA2 PN (*GMR91G04-GAL4*); VM6 PN (*GMR71D10-GAL4*); VM2 PN (*NP5103-GAL4*); DL3 PN (*NP6014-GAL4*); VC3 PN (*NP7365-GAL4*). Maximum z-projection is used for *GMR91E04-GAL4* images to show dendrite targeting of all 3 PN classes, all other images are single sections.

Scale bar, 20  $\mu$ m.



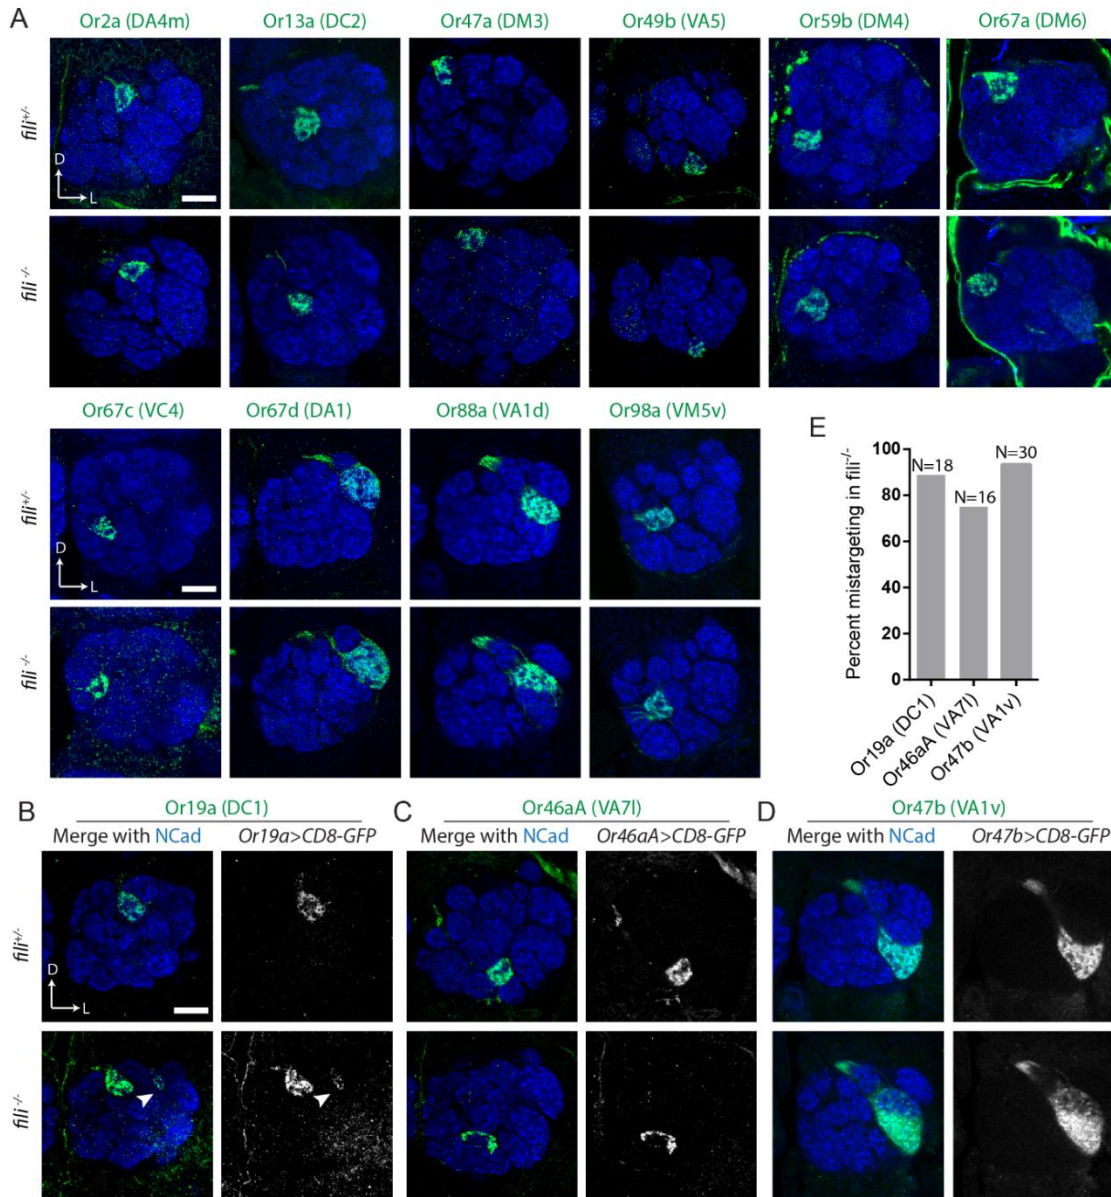

**Figure S8 Fili is required for the axon targeting of some ORN classes.**

ORN axons (green) in *fili*<sup>+/-</sup> and *fili*<sup>-/-</sup> animals visualized using either Or-promoter fused upstream of GAL4 to drive *UAS-mCD8-GFP* expression, or direct fusion of Or-promoter and *mCD8-GFP*, *mtdTomato*, or *rCD2*.

(A) ORN classes whose axon targeting does not require Fili.

(B) *Or19a-mCD8-GFP* labeled DC1 ORN axons shows an ectopic target on the lateral side of DC1 in *fili*<sup>-/-</sup>. Arrowhead points to the ectopic target. (mistargeting in 16/18 antennal lobes).

(C) *Or46aA-mCD8-GFP* labeled VA7I ORN axons are misshapen in *fili*<sup>-/-</sup> animal but no ectopic target site is observed (mistargeting in 12/16 antennal lobes).

(D) *Or47b-rCD2* labeled VA1v ORN axons invade the VA1d glomerulus in *fili*<sup>-/-</sup> animals (mistargeting in 28/30 antennal lobes).

(E) Quantification of mistargeting of DC1, VA7I, and VA1v ORN axons shown in (B–D).

Scale bars, 20  $\mu\text{m}$ .
